# Supplementary material
Source: MDPI journal article supplement (https://www.mdpi.com/2673-7523/4/2/7)
Supplement: s1 [file s1 › onco-2515446-supplementary.pdf]

## Supplementary materials

### Figure legends

#### Figure S1

Western blotting of p-AMPK, AMPK, and cyclin D1 expressed in QGP-1 cells at 24 h after metformin treatment. The areas enclosed by the square were shown in the Figure 2.

#### Figure S2

Western blotting of p-AMPK, AMPK, cyclin D1 and cyclin E expressed in RIN-m cells at 24 h after metformin treatment. The areas enclosed by the square were shown in the Figure 4B.

# Supplementary Materials

Figure S1

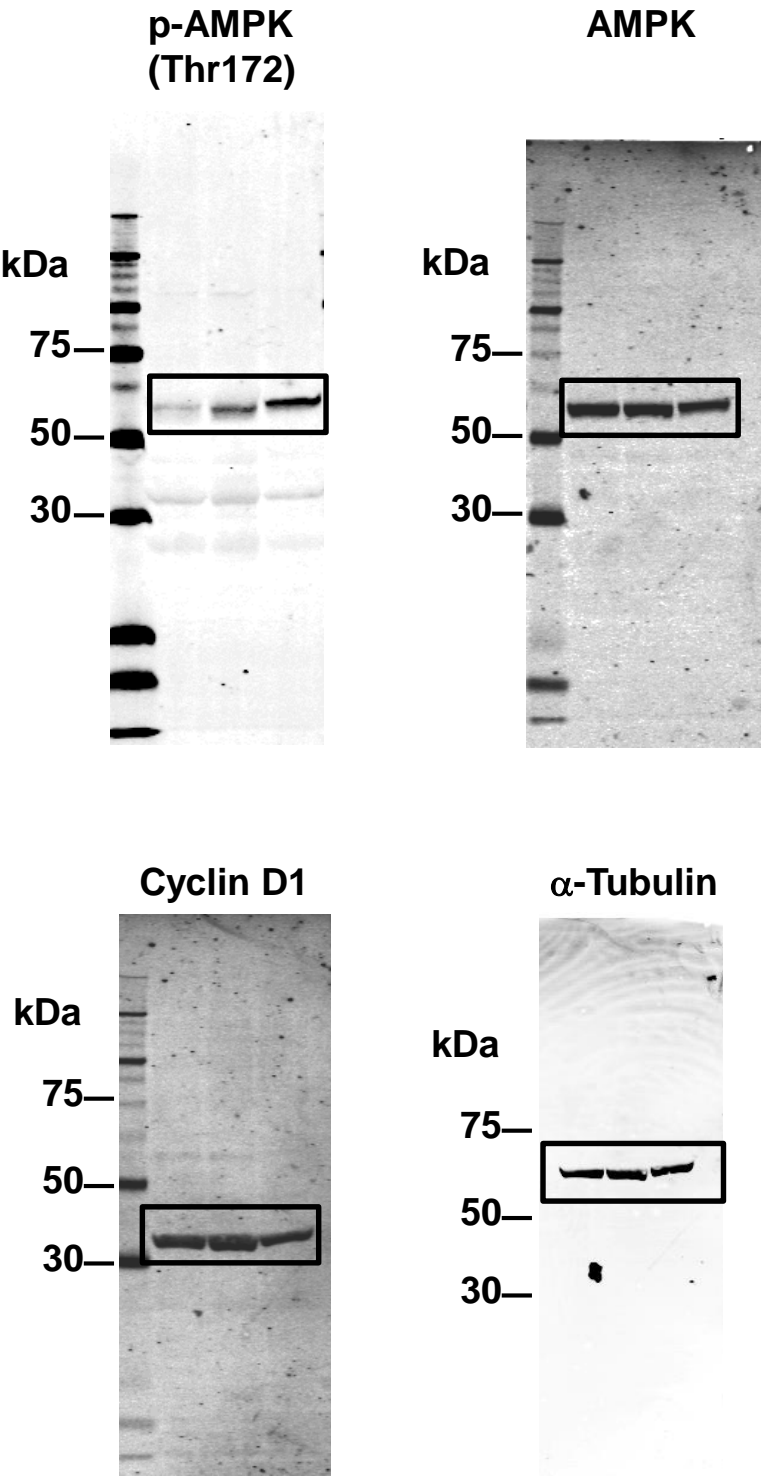

Figure S2

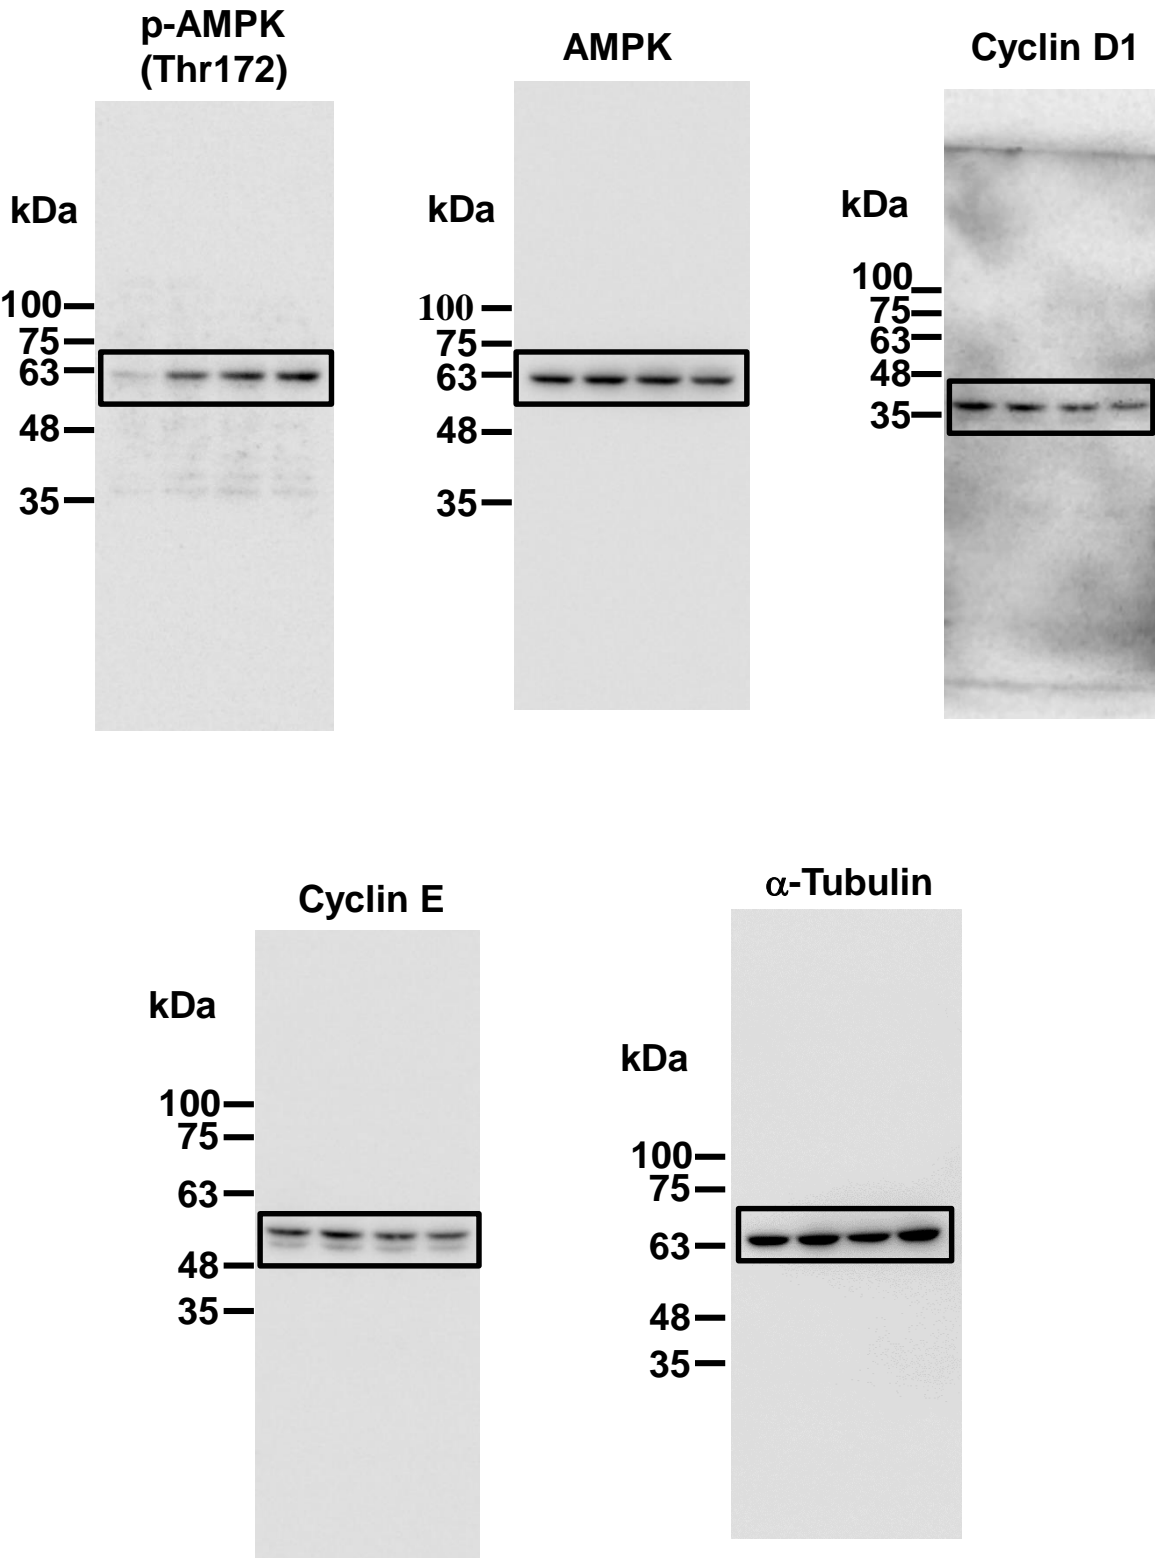

# Supplementary Materials

Table S1 Quantification of band intensities of p-AMPK, AMPK and cyclin D1 in QGP-1 cells at 24 h after metformin treatment

| Metformin (mM)    | Intensity of the bands |        |        |
|-------------------|------------------------|--------|--------|
|                   | 0                      | 1.0    | 2.0    |
| p-AMPK (Thr172)   | 4027.8                 | 7221.4 | 7329.9 |
| AMPK              | 9551.8                 | 9103.3 | 7851.5 |
| Cyclin D1         | 8633.2                 | 9999.4 | 6325.2 |
| $\alpha$ -Tubulin | 7417.5                 | 7554.1 | 7360.6 |

Band intensities of western blotting of p-AMPK, AMPK, and cyclin D1 in QGP-1 cells were quantified by ImageJ.

Table S2 Relative band intensities of p-AMPK, AMPK and cyclin D1 in QGP-1 cells at 24 h after metformin treatment

| Metformin (mM)    | Relative intensity of the bands |     |     |
|-------------------|---------------------------------|-----|-----|
|                   | 0                               | 1.0 | 2.0 |
| p-AMPK (Thr172)   | 1.0                             | 1.9 | 2.2 |
| AMPK              | 1.0                             | 0.9 | 0.8 |
| Cyclin D1         | 1.0                             | 1.1 | 0.7 |
| $\alpha$ -Tubulin | 1.0                             | 1.0 | 1.0 |

Relative band intensities of western blotting of p-AMPK, AMPK, and cyclin D1 were calculated. p-AMPK was normalized by AMPK, and AMPK and cyclin D1 were normalized by  $\alpha$ -tubulin. Relative intensity values were based on that from the non-treatment of metformin.

# Supplementary Materials

Table S3 Quantification of band intensities of p-AMPK, AMPK, cyclin D1 and cyclin E in RIN-m cells at 24 h after metformin treatment

| Metformin (mM)    | Intensity of the bands |          |          |          |
|-------------------|------------------------|----------|----------|----------|
|                   | 0                      | 1.0      | 2.0      | 4.0      |
| p-AMPK            | 2305.3                 | 8648.9   | 11284.4  | 13690.2  |
| AMPK              | 12395.8                | 13809.8  | 12456.0  | 9526.4   |
| Cyclin D1         | 412311.0               | 335918.0 | 282850.0 | 265894.0 |
| Cyclin E          | 12269.3                | 13119.8  | 9293.8   | 8761.7   |
| $\alpha$ -tubulin | 13725.5                | 14986.0  | 12548.2  | 15961.2  |

Band intensities of western blotting of p-AMPK, AMPK, cyclin D1 and cyclin E in QGP-1 cells were quantified by ImageJ.

Table S4 Relative band intensities of p-AMPK, AMPK, cyclin D1 and cyclin E in RIN-m cells at 24 h after metformin treatment

| Metformin (mM)    | Relative intensity of the bands |     |     |     |
|-------------------|---------------------------------|-----|-----|-----|
|                   | 0                               | 1.0 | 2.0 | 4.0 |
| p-AMPK            | 1.0                             | 3.4 | 4.9 | 7.7 |
| AMPK              | 1.0                             | 1.0 | 1.1 | 0.7 |
| Cyclin D1         | 1.0                             | 0.7 | 0.8 | 0.6 |
| Cyclin E          | 1.0                             | 1.0 | 0.8 | 0.6 |
| $\alpha$ -tubulin | 1.0                             | 1.1 | 0.9 | 1.2 |

Relative band intensities of western blotting of p-AMPK, AMPK, cyclin D1 and cyclin E were calculated. p-AMPK was normalized by AMPK, and AMPK, cyclin D1 and cyclin E were normalized by  $\alpha$ -tubulin. Relative intensity values were based on that from the non-treatment of metformin.
